# Supplementary figures and images for: ECI2 drives melanoma progression via arachidonic acid metabolism and NETs-induced TLR3/COX2/PGE2 positive feedback loop
Source: Research Square preprint supplement (doi:10.21203/rs.3.rs-7944532/v1), 2025-11-26

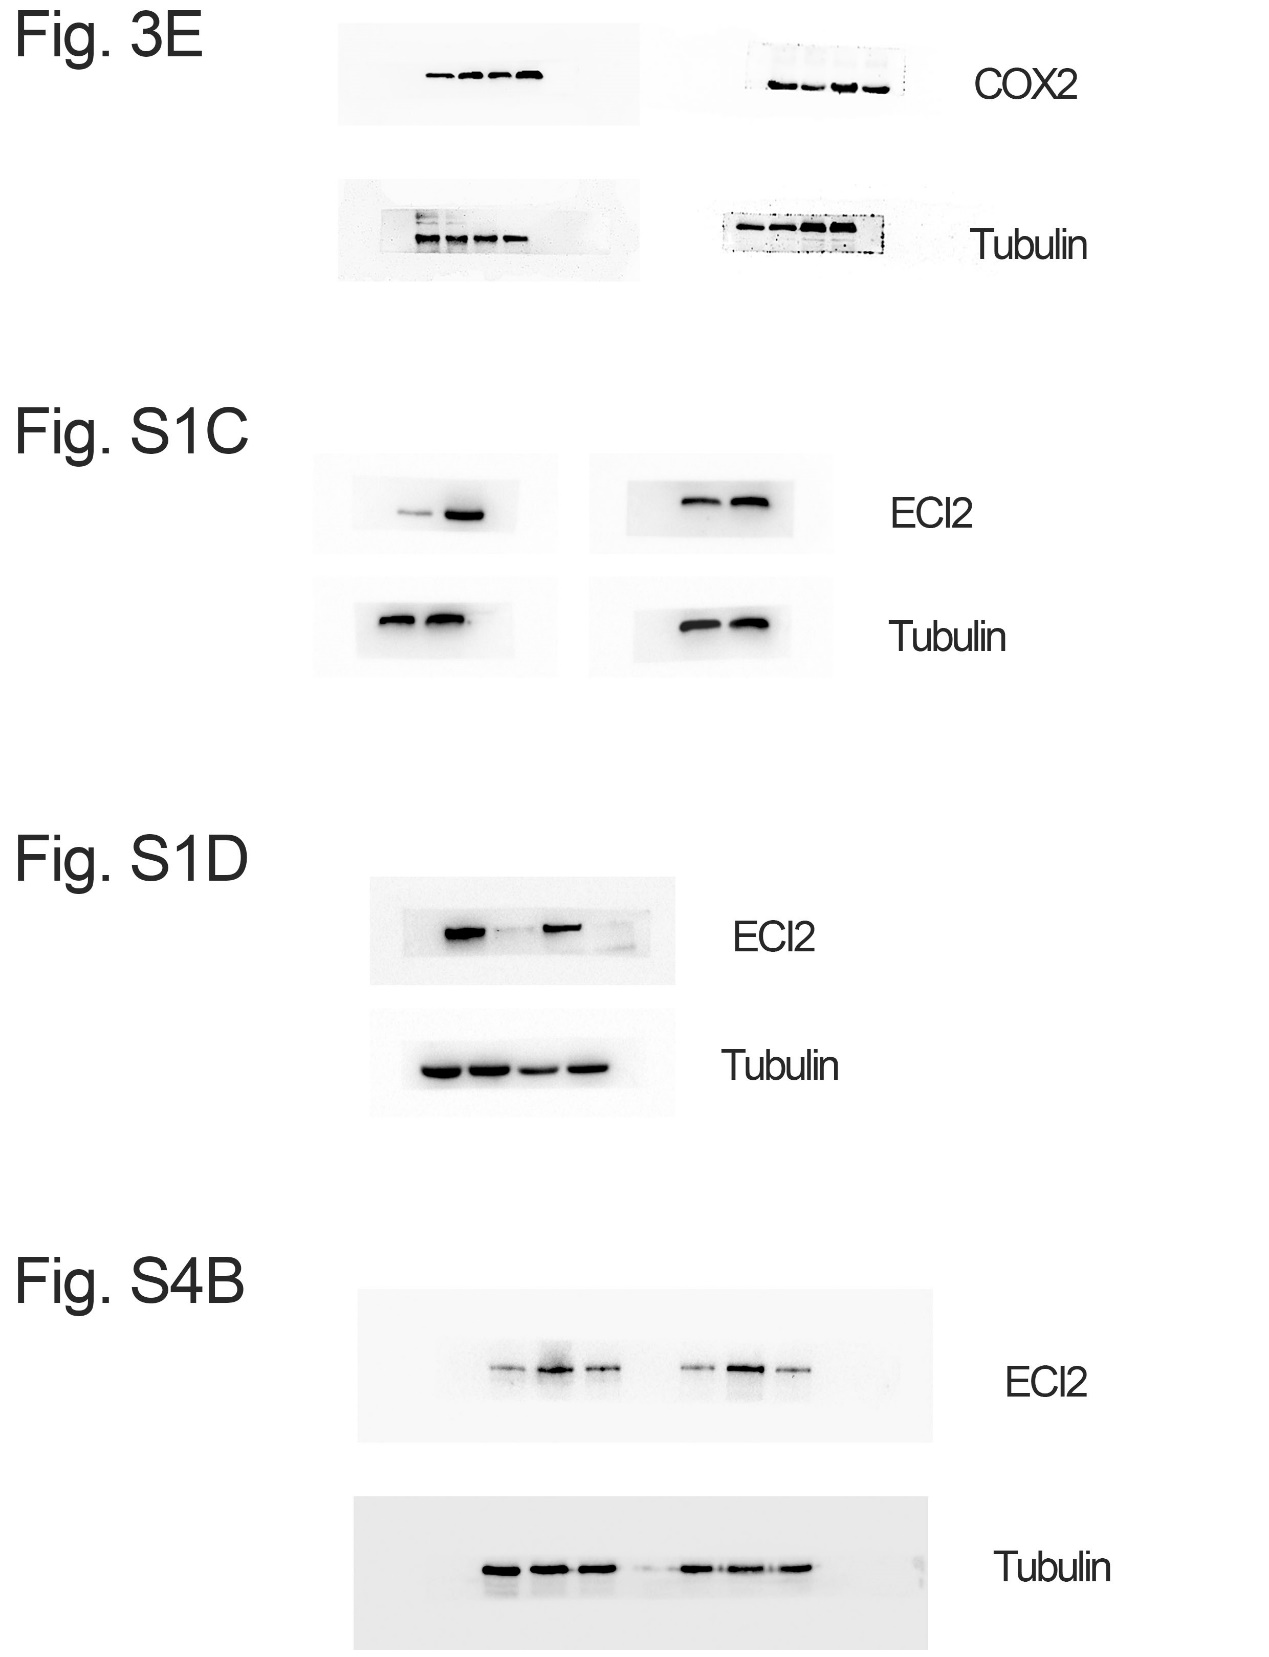

Supplement: Supplementary file 2 [file 4ad8a65411bc38cc17aec1db.docx]
